# Supplementary material
Source: PubMed Central journal article supplement (PMC7669229)
Supplement: djaa016_supplementary_data.pdf [file djaa016_supplementary_data.pdf]

**Supplementary Table 1: Test-retest Reliability of Pediatric PRO-CTCAE Symptom Adverse Event Items in a Sample of Children and Adolescents (n = 46) in Maintenance Phase of Treatment for Acute Lymphoblastic Leukemia.**

| Pediatric PRO-CTCAE Symptom AE Item | Intraclass Correlation* (95% CI) | Percent Agreement |
|-------------------------------------|----------------------------------|-------------------|
| Abdominal Pain - F                  | 0.56 (0.37, 0.74)                | 69.6%             |
| Abdominal Pain - S                  | 0.37 (0.17, 0.63)                | 71.7%             |
| Abdominal Pain - I                  | 0.00 (., .)                      | 79.5%             |
| Pain - F                            | 0.55 (0.36, 0.74)                | 63.0%             |
| Pain - S                            | 0.45 (0.24, 0.68)                | 54.3%             |
| Pain - I                            | 0.04 (0.00, 0.99)                | 58.7%             |
| Headache - F                        | 0.78 (0.65, 0.87)                | 80.4%             |
| Headache - S                        | 0.58 (0.39, 0.76)                | 73.3%             |
| Headache - I                        | 0.73 (0.57, 0.84)                | 80.4%             |
| Mucositis - F                       | 0.26 (0.08, 0.59)                | 69.6%             |
| Mucositis - S                       | 0.38 (0.18, 0.64)                | 76.1%             |
| Mucositis - I                       | 0.00 (., .)                      | 91.3%             |
| Neuropathy - S                      | 0.35 (0.15, 0.62)                | 71.7%             |
| Neuropathy - I                      | 0.00 (., .)                      | 87.0%             |
| Cough - F                           | 0.56 (0.36, 0.74)                | 65.2%             |
| Cough - S                           | 0.57 (0.37, 0.74)                | 63.0%             |
| Cough - I                           | 0.85 (0.75, 0.91)                | 93.5%             |
| Constipation - F                    | 0.38 (0.18, 0.64)                | 72.7%             |
| Constipation - S                    | 0.24 (0.06, 0.58)                | 69.6%             |
| Constipation - I                    | 0.06 (0.00, 0.91)                | 87.0%             |
| Diarrhea - F                        | 0.16 (0.02, 0.61)                | 77.3%             |
| Diarrhea - I                        | 0.00 (., .)                      | 90.9%             |
| Nausea - F                          | 0.28 (0.10, 0.60)                | 60.0%             |
| Nausea - S                          | 0.12 (0.01, 0.67)                | 63.0%             |
| Nausea - I                          | 0.13 (0.01, 0.65)                | 82.6%             |
| Vomiting - F                        | 0.37 (0.17, 0.63)                | 80.4%             |
| Vomiting - I                        | 0.00 (., .)                      | 89.1%             |
| Anorexia - F                        | 0.31 (0.11, 0.60)                | 65.2%             |
| Fatigue - S                         | 0.38 (0.18, 0.64)                | 67.4%             |
| Fatigue - I                         | 0.16 (0.02, 0.61)                | 65.2%             |
| Insomnia - F                        | 0.46 (0.25, 0.68)                | 60.9%             |
| Insomnia - S                        | 0.58 (0.38, 0.75)                | 64.4%             |
| Insomnia - I                        | 0.21 (0.05, 0.58)                | 80.4%             |
| Depression (Sadness) - S            | 0.56 (0.36, 0.74)                | 68.9%             |
| Depression (Sadness) - I            | 0.63 (0.44, 0.78)                | 89.1%             |
| Anxiety - F                         | 0.55 (0.35, 0.74)                | 63.0%             |
| Anxiety - S                         | 0.68 (0.51, 0.82)                | 65.2%             |
| Anxiety - I                         | 0.00 (., .)                      | 80.0%             |

\*The intraclass correlation (ICC) was calculated with a 2-way mixed-effects model to estimate absolute agreement. The formula is provided in Koo & Li (2015; reference 27). The ICCs are low due to low prevalence and skew of ordinal metric. Abbreviations: F, frequency; S, severity; I, interference; PRO-CTCAE, patient-reported outcome common terminology criteria adverse event; AE, adverse event; CI, confidence interval.
